# Supplementary material for: Slingshot-Cofilin activation mediates mitochondrial and synaptic dysfunction via Aβ ligation to β1-integrin conformers
Source: PubMed Central journal article supplement — Cell Death Differ. 2015 Feb 20;22(6):921–34. doi: 10.1038/cdd.2015.5 (PMC4423195; doi:10.1038/cdd.2015.5), 2015-02-20

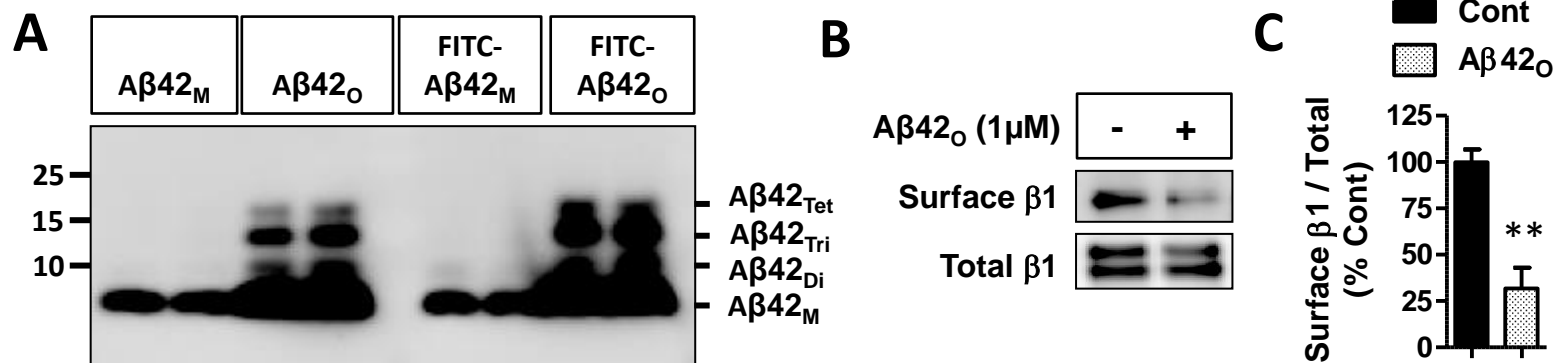

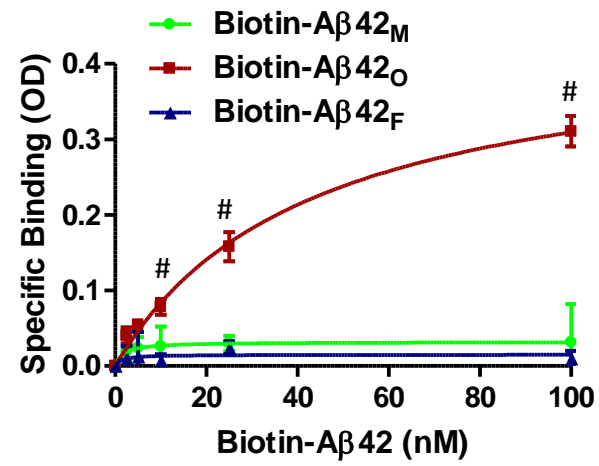

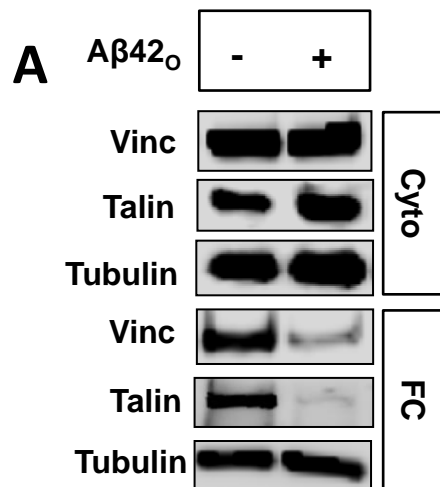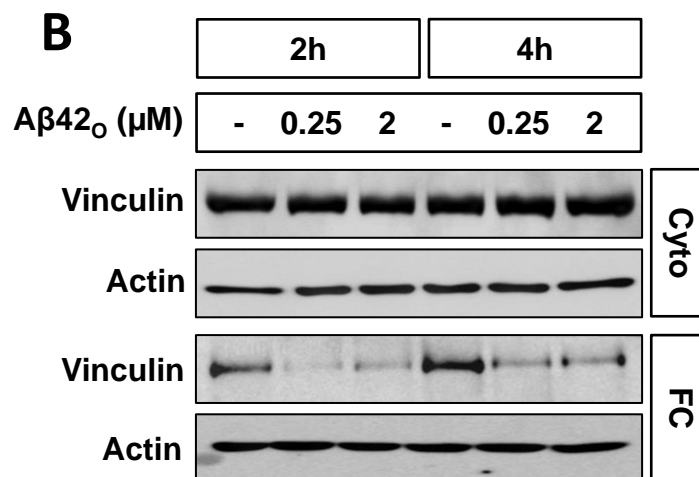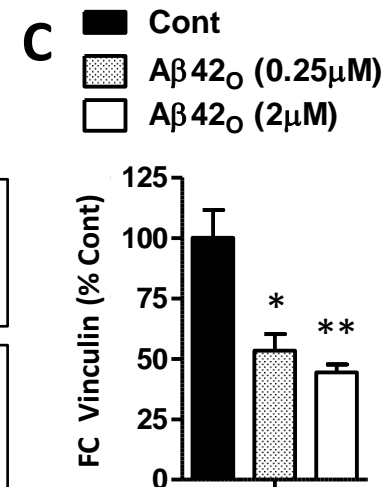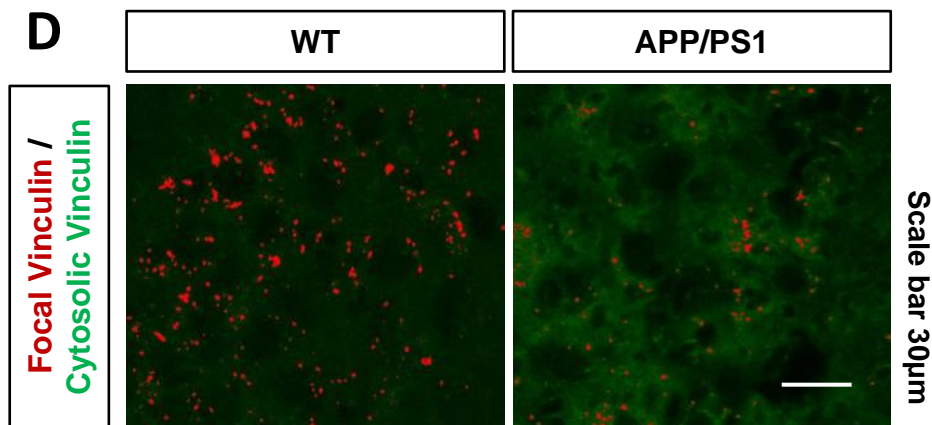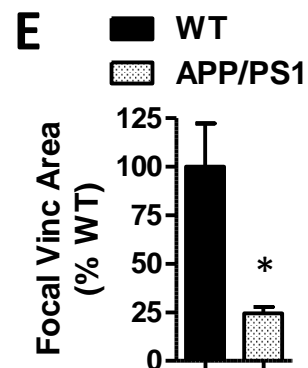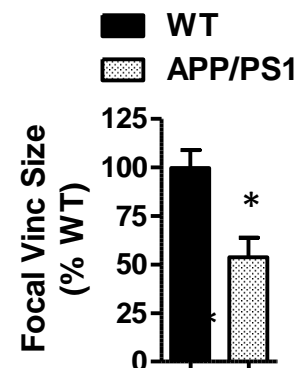

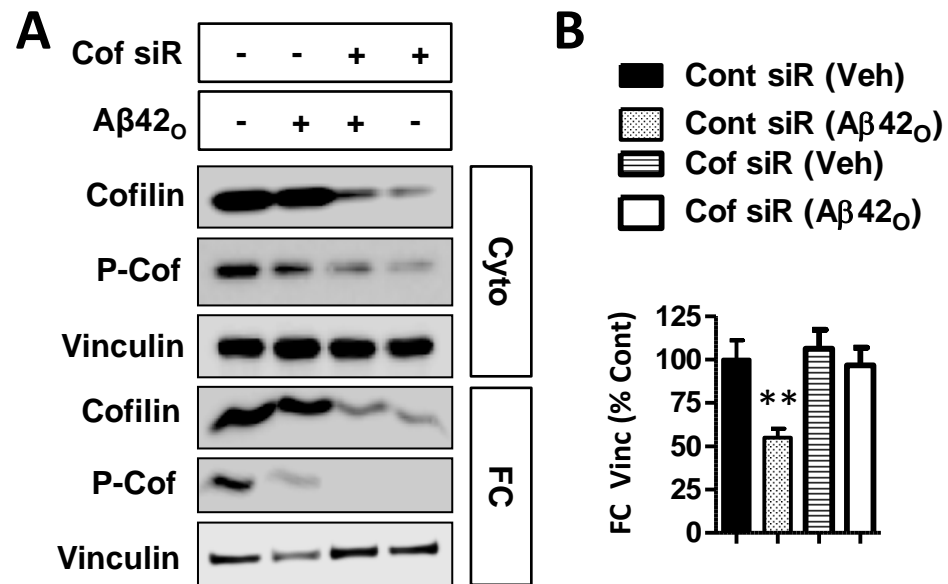

|                                         | <b>NC (n=4)</b>  | <b>AD (n=5)</b> |
|-----------------------------------------|------------------|-----------------|
| <b>Gender</b>                           | 2M & 2F          | 2M & 3F         |
| <b>Age Range</b>                        | 82-95            | 82-96           |
| <b>Average Age (<math>\pm</math>SD)</b> | 88.75 $\pm$ 6.70 | 88.4 $\pm$ 5.94 |
| <b>PMI Range (h)</b>                    | 3.87-8.6         | 3.0-7.8         |
| <b>Average PMI (<math>\pm</math>SD)</b> | 5.63 $\pm$ 2.15  | 4.46 $\pm$ 1.93 |

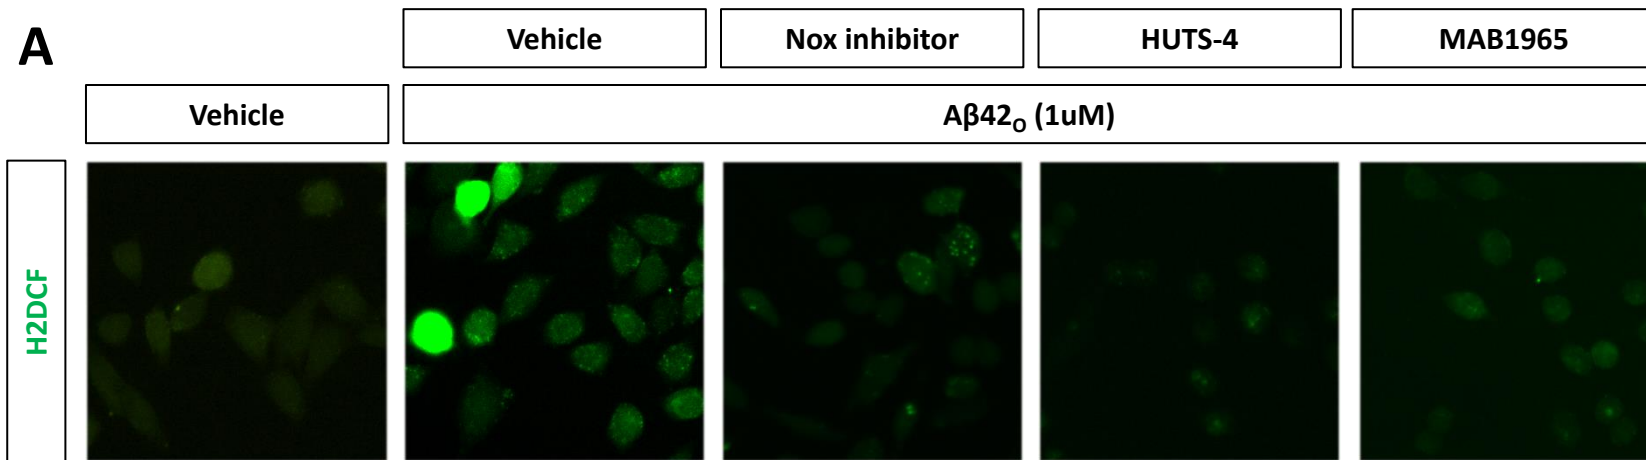

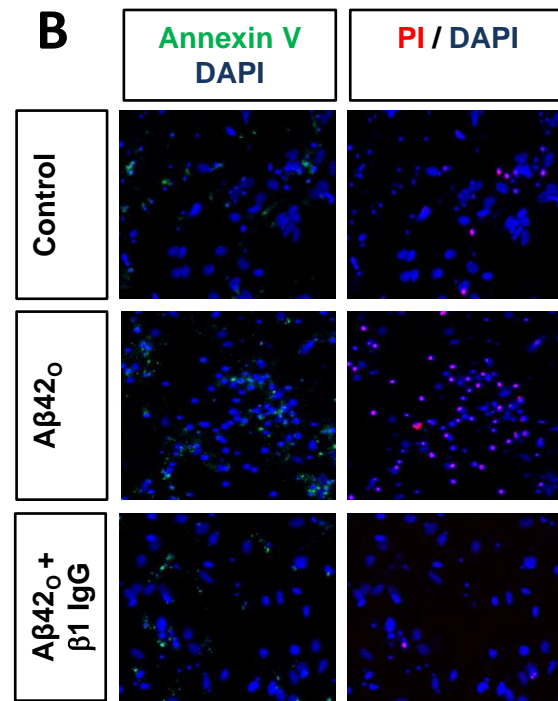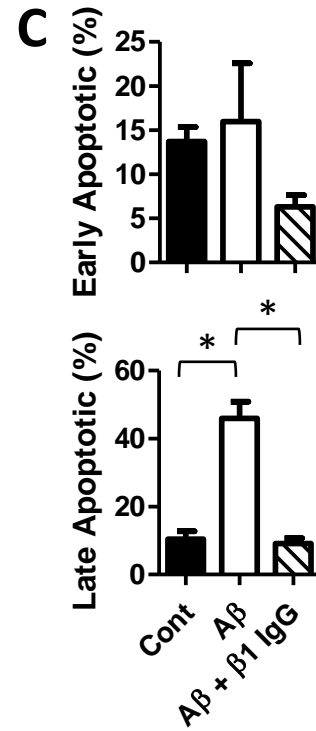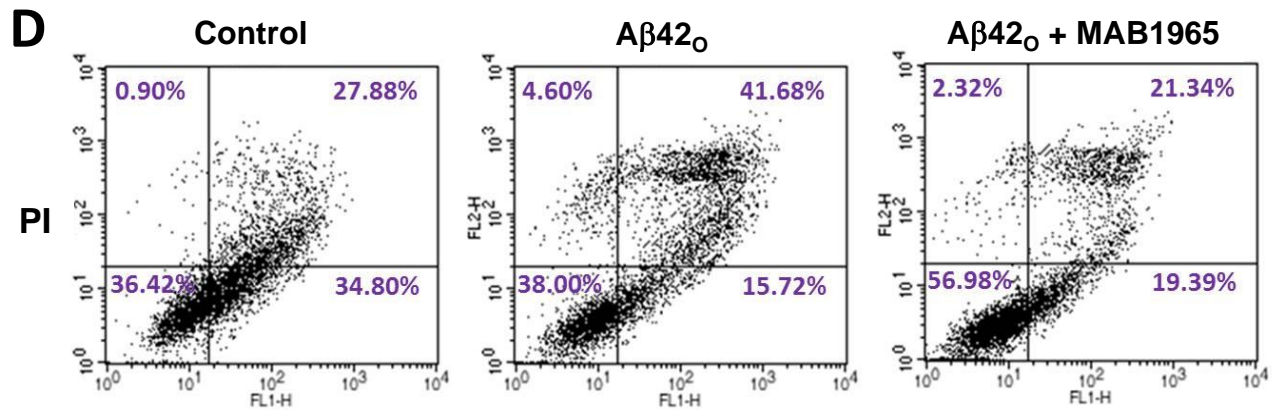

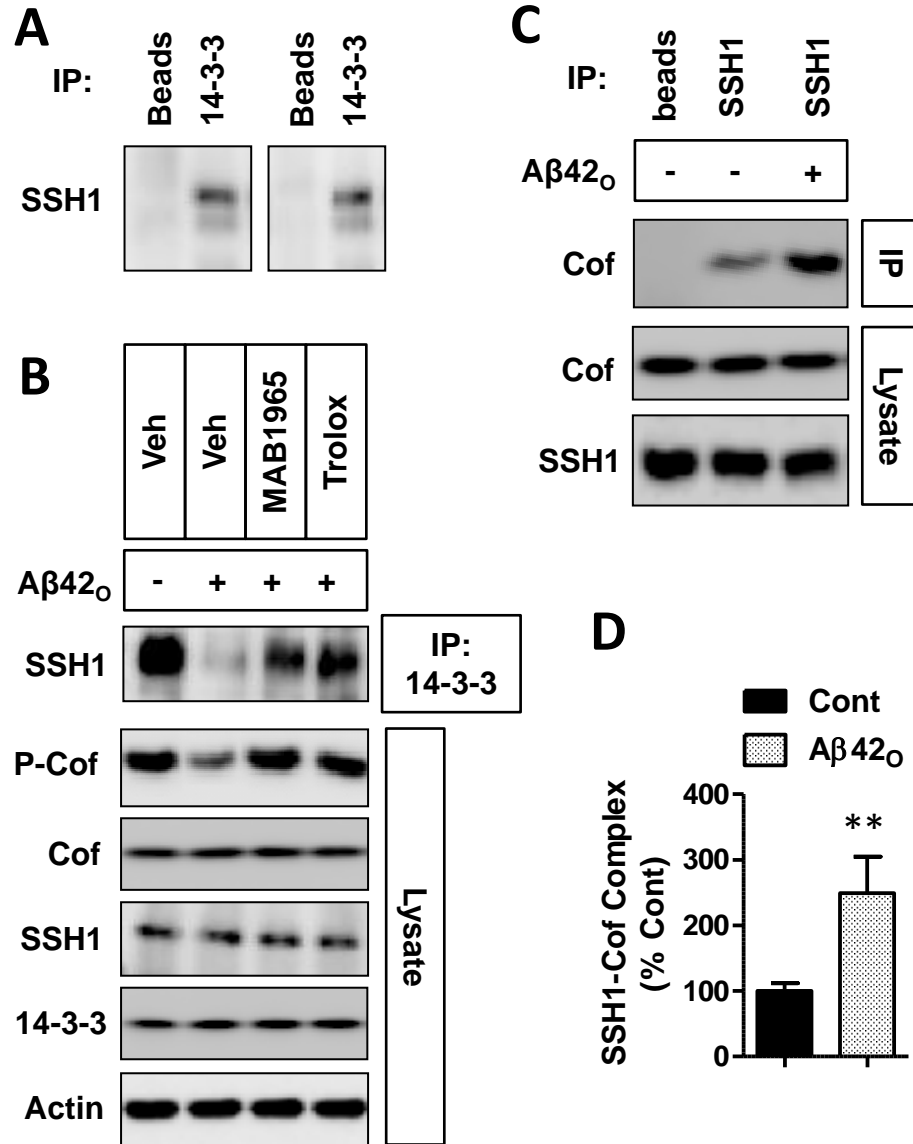



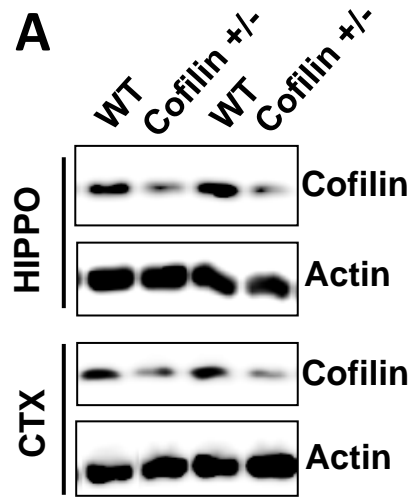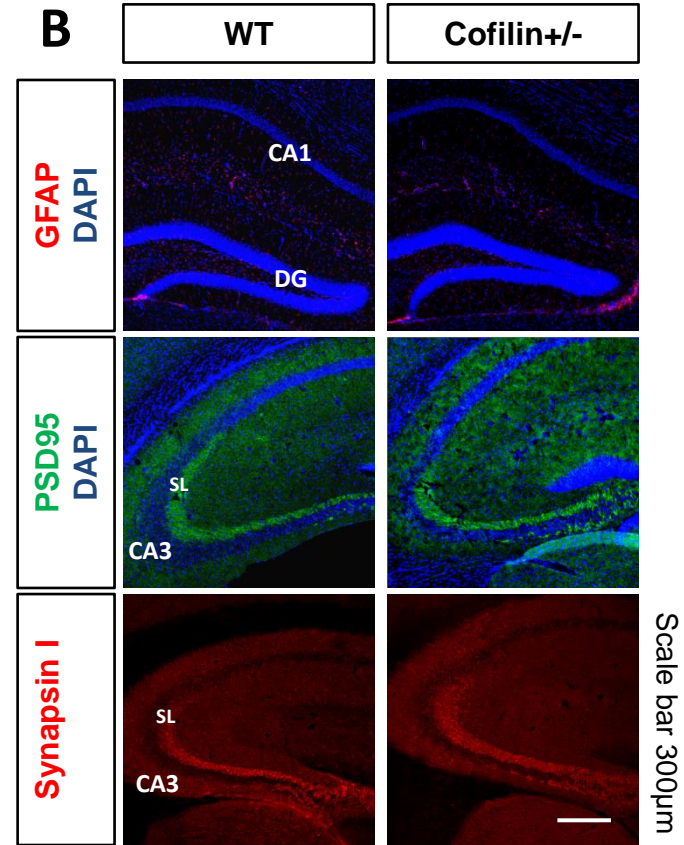

Supplement: cdd20155x1.pdf [file cdd20155x1.pdf]
